# Supplementary material for: Surface deposition of marine fog and its treatment in the WRF model
Source: Copernicus journal article supplement (doi:10.5194/acp-2021-344), 2021-06-28
Supplement: Supplementary file 1 [file acp-2021-344-supplement.pdf]

Cheng, L., Chen, Z. and Chen, Y.,

Centre for Research in Earth and Space Science, Lassonde School of Engineering, York University, Toronto, Ontario, M3J 1P3, Canada

Supplementary material related to

Surface deposition of marine fog and its treatment in the WRF model

by Peter A. Taylor, Zheqi Chen, Li Chen<sup>1</sup>, Soudeh Afsharian, Wensong Weng, George A. Isaac, Terry W. Bullock and Yongsheng Chen.

### WRF Coding notes

**A "Katata like" approach with module\_bl\_mynn and module\_sf\_fogdes:** A quick fix to increase deposition of  $Q_c$  to a water surface with module\_bl\_mynn could be to modify the WRF implementation of the Katata scheme in module\_sf\_fogdes to allow an extra land use category "water" with a more appropriate estimate of vdfg, the deposition velocity (m/s) of fog mixing ratio ( $Q_c$ , kg/kg). There is however an additional complication in that module\_bl\_fogdes deals with gravitational settling of fog droplets through the air column as well as to the surface. However, as explained in a note posted at <https://repository.library.noaa.gov/view/noaa/19837>, that process is also dealt with in the microphysics module\_mp\_thompson. It should not be double counted. The Thompson microphysics code removes cloud droplets from the lowest level with its settling velocity  $sed\_n(k)$  and relationships like  $nc(k) = \text{MAX}(10., nc(k) + (sed\_n(k+1)-sed\_n(k)) * odzq * DT)$ .

Therefore we have left sedimentation through the air column, and sedimentation to the surface via simple droplet settling, as being treated by the Thompson microphysics code, although in some test cases we can set that settling velocity,  $vtck(k)=0$ . We can still use the option  $grav\_settling = 2$  in module\_bl\_mynn, BUT with the parameter  $gno$  set to 0 in module\_bl\_fogdes so that there is no settling through the air column while it remains active at the surface, just because that was the way it was coded in bl\_fogdes.

One could set a deposition velocity  $vdfg(i,j)$  within module\_sf\_fogdes based on the lowest grid level wind speed, as discussed in section 3 above, or on the surface friction velocity. Then the turbulent flux of cloud droplets to the water surface from the lowest model level (called  $gfluxm$  for compatibility with existing code, even though not gravitational) could be represented (in module\_bl\_fogdes) as  $gfluxm = grav\_settling2 * qc\_curr(i,k,j) * vdfg(i,j)$ . The parameter  $grav\_settling2 = 1$  if  $grav\_settling = 2$  and  $qc\_curr(i,k,j)$  is the  $Q_c$  value at the current grid point, which has  $k = kts$  (normally = 1). This is the normal use of bl\_mynn, but with module\_sf\_fogdes adjusted to provide vdfg values.

These could be defined by  $vdfg(i,j) = vtune * wspd(i,j)$  with  $vtune$  as a tuning option. This approach matches the WRF Katata code in module\_sf\_fogdes which has access to the lowest grid level wind speed ( $wspd$ ) although  $vtune$  should be dependent on the lowest grid level. Our preferred approach is to use  $ustar (=ust(i,j))$  as the velocity scale rather than  $wspd$  and a cloud droplet roughness length ( $z_{0c}$ ) as the tuning parameter, maybe starting with  $z_{0c} = 0.01$  (m). The deposition velocity would then be,

$$vdfg(i,j) = ust(i,j) * karman / \text{LOG}(1+z1/z0c). \quad (A1)$$

In WRF the lowest grid cell centre (mass point) is at  $z1 = 0.5 * dz8w(i,kts,j)$ . The friction velocity,  $ust$  and the karman constant (0.4) are used or computed in other modules and need to be made accessible to module\_sf\_fogdes. Note that  $ust$  is an input variable in module\_bl\_mynn. It is an in/out variable in module\_sf\_sfclayrev and other places.

**A direct approach in module\_bl\_mynn:** An alternative approach would be to still leave gravitational settling in the Thompson microphysics module, set  $grav\_settling = 0$  in module\_bl\_mynn, and then,  $vdfg(i,j)$  defined in

module\_sf\_fogdes, the settling of the cloud droplets through the air column and at the surface defined in module\_bl\_fogdes, are all turned to 0. When the tridiagonal matrices are being set up for cloud water, represent the downward flux of cloud water at the lower boundary by vdfg(i,j)\*qc(1) so that for k = kts = 1 the code lines read

```
a(k)= 0 ! This is not used anyway
b(k)=1.+ dtz(k)*(khdz(k+1)/rho(k)+ depvel)- 0.5*dtz(k)*s_aw(k+1)
c(k)= -dtz(k)*khdz(k+1)/rho(k)      - 0.5*dtz(k)*s_aw(k+1)
d(k)= sqc(k) + qcd(k)*delt - dtz(k)*s_awqc(k+1)+ det_sqc(k)*delt
```

where depvel is used instead of vdfg to distinguish from vdfg defined in module\_sf\_fogdes. As with the Katata scheme extension depvel could be defined in terms of the friction velocity ust and with a roughness length for cloud droplets z<sub>0c</sub> serving as a tuning parameter (see Eq. A1). ust is a known quantity within module\_bl\_mynn and in that module z1 can be set = 0.5 \* dz(1). The s<sub>aw</sub>, s<sub>awc</sub> and s<sub>awqc</sub> terms are associated with mass flux and convective plume mixing, det\_sqc is a "detrainment term" and qcd is a counter-gradient term. All should be = 0 at the lowest level but are left to minimize code changes.

**Code changes:** The additional deposition velocity vdfg defined in terms of ust and z<sub>0c</sub> (Eq. A1), are implemented to module\_sf\_fogdes or module\_bl\_mynn.

- i) For the "Katata like" approach, Katata's vdfg in module\_sf\_fogdes is replaced by  
 $vdfg(i,j) = ust(i,j)*karman/LOG(1+0.5*dz8w(i,kts,j)/z0c)$   
ust and karman need to be made accessible to the SUBROUTINE sf\_fogdes.
- ii) For the direct approach, in module\_bl\_mynn, the deposition velocity, depvel is given by  
 $depvel = ust*vk/LOG(1.0+0.5*dz(kts)/z0c)$   
and is added to term b(k) in the tridiagonal matrices for the cloud water (Eq. A2).  
flqc is removed from term d(k) in the matrices for both approaches.

To make z<sub>0c</sub> a namelist.input parameter, z0c is added in Registry.EM\_COMMON

```
rconfig real z0c          namelist,physics 1      0.01  h  "z0c"  "roughness length for cloud
droplets, default is 0.01"
```

The z0c is added to the relevant subroutines, and also where the subroutines are called. The following modules, module\_bl\_mynn, module\_sf\_fogdes, module\_pbl\_driver, module\_surface\_driver, module\_first\_rk\_step\_part1 and Registry.EM\_COMMON, are modified. The codes for these modules are posted separately, module\_bl\_mynn.F\_KatataLike and module\_bl\_mynn.F\_Direct are the codes of the module\_bl\_mynn for the "Katata like" approach and direct approach respectively.

**SCM study:** The following code changes are done for the SCM study. In module\_initialize\_scm\_xy.F, the following code from line 321 to 330

```
! this is adopted from Wayne Angevine's GABLS case
grid%znw(1) = 1.0
zrwa(kde) = exp((kde-1)/40.)
zwa(kde) = grid%ztop
DO k=2, kde-1
  zrwa(k) = exp((k-1)/40.)
  zwa(k) = (zrwa(k)-1.) * grid%ztop/(zrwa(kde)-1.)
  grid%znw(k) = 1. - (zwa(k) / zwa(kde))
ENDDO
grid%znw(kde) = 0.
```

are replaced with the following:  
! Read config instead

```
DO k=1, kde
  grid%znw(k) = model_config_rec%eta_levels(k)
ENDDO
```

It can allow the model to use user-specified eta levels in the namelist.

In module\_first\_rk\_step\_part1.F, the following code are inserted on line 163, after rk\_step=1,

```
! Decrease TSK
IF (ANY(grid%tsk.GE.282)) THEN
  grid%tsk = grid%tsk-3*(grid%dt)/3600
ENDIF
```

It can force the skin temperature (TSK) to decrease, for our SCM study.

### 3D WRF namelist.input

The following is a namelist.input file for a 3D WRF simulation. The WRF codes are modified with “Katata like” approach. It is a two-way simulation with two nested domains. The horizontal resolutions are 30 km and 10 km for the parent and nested domains respectively. 101 vertical levels with increasing spacing between levels are used. The physics schemes are listed in the table below.

| Physics                                   | Scheme                                 | Namelist option                        |
|-------------------------------------------|----------------------------------------|----------------------------------------|
| Microphysics                              | Thompson scheme                        | mp_physics = 8                         |
| PBL                                       | MYNN scheme                            | bl_pbl_physics = 5                     |
| Longwave radiation<br>Shortwave radiation | Goddard shortwave and longwave schemes | ra_lw_physics = 5<br>ra_sw_physics = 5 |
| Surface layer physics                     | MYNN scheme                            | sf_sfclay_physics = 5                  |
| Land surface model option                 | Unified Noah land surface scheme       | sf_surface_physics = 2                 |

z0c can be set to be different values for sensitivity test. Here grav\_settling = 2, 2, 0. To work with WRF code modified with direct approach, one should set grav\_settling = 0, 0, 0.

namelist.input

```
&time_control
run_days           = 0,
run_hours          = 36,
start_year         = 2018, 2018, 2000,
start_month        = 07, 07, 01,
start_day          = 01, 01, 24,
start_hour         = 12, 12, 12,
end_year           = 2018, 2018, 2000,
end_month          = 07, 07, 01,
end_day            = 03, 03, 25,
end_hour           = 00, 00, 12,
interval_seconds   = 21600
input_from_file    = .true.,.true.,.true.,
```

```
history_interval      = 60, 60, 60,
frames_per_outfile   = 1, 1, 1000,
restart               = .false.,
restart_interval     = 360,
io_form_history       = 2
io_form_restart      = 2
io_form_input        = 2
io_form_boundary     = 2
/
```

```
&domains
```

```
time_step            = 30,
time_step_fract_num  = 0,
time_step_fract_den  = 1,
max_dom              = 2,
e_we                 = 120, 181, 94,
e_sn                 = 100, 181, 91,
e_vert               = 101, 101, 33,
p_top_requested      = 5000,
num_metgrid_levels   = 32,
num_metgrid_soil_levels = 4,
```

```
eta_levels=1,0.999550329,0.999064684,0.998540576,0.997975378,0.99736632,0.996710487,0.996004811,0.9
95246067,0.994430874,0.993555682,0.992616776,0.991610268,0.990532098,0.989378024,0.988143627,0.986
824303,0.985415265,0.98391154,0.982307967,0.9805992,0.978779705,0.976843763,0.974785468,0.97259873
6,0.970277302,0.967814724,0.965204392,0.962439528,0.959513195,0.956418307,0.953147628,0.949693791,
0.946049303,0.942206555,0.938157835,0.933895342,0.929411201,0.924697471,0.919746169,0.914549282,0.
909098788,0.90338667,0.897404939,0.891145657,0.884600951,0.877763042,0.870624266,0.863177094,0.855
414162,0.847328292,0.838912519,0.830160115,0.821064616,0.811619851,0.801819962,0.791659437,0.78113
3134,0.770236304,0.758964624,0.747314215,0.735281673,0.722864089,0.710059077,0.696864792,0.6832799
57,0.669303878,0.654936469,0.640178266,0.625030447,0.609494844,0.593573958,0.577270971,0.560589754
,0.543534878,0.526111617,0.508325952,0.490184573,0.471694881,0.452864977,0.433703668,0.414220448,0.
394425497,0.374329663,0.353944449,0.333281996,0.312355063,0.291177007,0.269761757,0.248123788,0.22
6278095,0.20424016,0.182025921,0.15965174,0.137134364,0.114490891,0.091738729,0.068895558,0.045979
29,0.023008022,0
```

```
dx                   = 30000, 10000, 3333.33,
dy                   = 30000, 10000, 3333.33,
grid_id              = 1, 2, 3,
parent_id            = 0, 1, 2,
i_parent_start       = 1, 40, 30,
j_parent_start       = 1, 30, 30,
parent_grid_ratio    = 1, 3, 3,
parent_time_step_ratio = 1, 3, 3,
feedback             = 1,
smooth_option        = 0
/
```

```
&physics
```

```
physics_suite        = 'CONUS'
mp_physics           = 8, 8, -1,
cu_physics           = -1, -1, 0,
ra_lw_physics        = 5, 5, -1,
ra_sw_physics        = 5, 5, -1,
```

```

bl_pbl_physics          = 5,  5, -1,
bl_mynn_mixlength      = 2,
sf_sfclay_physics      = 5,  5, -1,
sf_surface_physics     = -1, -1, -1,
radt                   = 30, 30, 30,
bldt                   = 0,  0,  0,
cudt                   = 5,  5,  5,
icloud                 = 1,
num_land_cat           = 21,
sf_urban_physics       = 0,  0,  0,
grav_settling          = 2,  2,  0,
z0c                    = 0.01,
/

&fdda
/

&dynamics
hybrid_opt             = 0,
w_damping              = 0,
diff_opt               = 1,  1,  1,
km_opt                 = 4,  4,  4,
diff_6th_opt           = 0,  0,  0,
diff_6th_factor        = 0.12, 0.12, 0.12,
base_temp              = 290.
damp_opt               = 0,
zdamp                  = 5000., 5000., 5000.,
dampcoef               = 0.2,  0.2,  0.2
khdif                  = 0,  0,  0,
kvdif                  = 0,  0,  0,
non_hydrostatic        = .true., .true., .true.,
moist_adv_opt          = 1,  1,  1,
scalar_adv_opt         = 1,  1,  1,
gwd_opt                = 1,
/

&bdy_control
spec_bdy_width         = 5,
spec_zone              = 1,
relax_zone             = 4,
specified               = .true., .false., .false.,
nested                 = .false., .true., .true.,
/

&grib2
/

&namelist_quilt
nio_tasks_per_group = 0,
nio_groups = 1,
/

```

## SCM input files

The following files are required for a SCM simulation.

### namelist.input

```
&time_control
run_days           = 4,
run_hours          = 0,
run_minutes        = 0,
run_seconds        = 0,
start_year         = 2018,
start_month        = 08,
start_day          = 15,
start_hour         = 00,
start_minute       = 00,
start_second       = 00,
end_year           = 2018,
end_month          = 08,
end_day            = 19,
end_hour           = 00,
end_minute         = 00,
end_second         = 00,
history_interval   = 60,
frames_per_outfile = 10000,
restart            = .false.,
restart_interval   = 100000,
io_form_history    = 2
io_form_restart    = 2
io_form_input      = 2
io_form_boundary   = 2
auxinput3_inname   = "force_ideal.nc"
auxinput3_interval_h = 240
io_form_auxinput3  = 2
/

&domains
time_step          = 60,
time_step_fract_num = 0,
time_step_fract_den = 1,
max_dom            = 1,
s_we               = 1,
e_we               = 3,
s_sn               = 1,
e_sn               = 3,
s_vert             = 1,
p_top_requested    = 5000,
e_vert             = 101,
eta_levels=1,0.999550329,0.999064684,0.998540576,0.997975378,0.99736632,0.996710487,0.996004811,0.9
95246067,0.994430874,0.993555682,0.992616776,0.991610268,0.990532098,0.989378024,0.988143627,0.986
824303,0.985415265,0.98391154,0.982307967,0.9805992,0.978779705,0.976843763,0.974785468,0.97259873
```

6,0.970277302,0.967814724,0.965204392,0.962439528,0.959513195,0.956418307,0.953147628,0.949693791,  
0.946049303,0.942206555,0.938157835,0.933895342,0.929411201,0.924697471,0.919746169,0.914549282,0.  
909098788,0.90338667,0.897404939,0.891145657,0.884600951,0.877763042,0.870624266,0.863177094,0.855  
414162,0.847328292,0.838912519,0.830160115,0.821064616,0.811619851,0.801819962,0.791659437,0.78113  
3134,0.770236304,0.758964624,0.747314215,0.735281673,0.722864089,0.710059077,0.696864792,0.6832799  
57,0.669303878,0.654936469,0.640178266,0.625030447,0.609494844,0.593573958,0.577270971,0.560589754  
.543534878,0.526111617,0.508325952,0.490184573,0.471694881,0.452864977,0.433703668,0.414220448,0.  
394425497,0.374329663,0.353944449,0.333281996,0.312355063,0.291177007,0.269761757,0.248123788,0.22  
6278095,0.20424016,0.182025921,0.15965174,0.137134364,0.114490891,0.091738729,0.068895558,0.045979  
29,0.023008022,0

dx = 4000,  
dy = 4000,  
ztop = 12000.,  
/

&scm

scm\_force = 0  
scm\_force\_dx = 1000.  
num\_force\_layers = 8  
scm\_lu\_index = 16  
scm\_isltyp = 14  
scm\_lat = 43.93  
scm\_lon = -60.01  
scm\_th\_adv = .false.  
scm\_wind\_adv = .false.  
scm\_qv\_adv = .false.  
scm\_ql\_adv = .false.  
scm\_vert\_adv = .false.  
scm\_force\_ql\_largescale = .false.  
scm\_force\_wind\_largescale = .false.  
/

&physics

mp\_physics = 8,  
ra\_lw\_physics = 0,  
ra\_sw\_physics = 0,  
cldovrlp = 4,  
radt = 30,  
sf\_sfclay\_physics = 1,  
sf\_surface\_physics = 2,  
bl\_pbl\_physics = 1,  
bldt = 0,  
cu\_physics = 6,  
cudt = 5,  
num\_soil\_layers = 4,  
grav\_settling = 0,  
z0c = 0.01  
/

&dynamics

hybrid\_opt = 2,  
w\_damping = 0,

```

diff_opt          = 1,
km_opt           = 4,
diff_6th_opt     = 0,
diff_6th_factor  = 0.12,
base_temp        = 290,
damp_opt         = 3,
zdamp            = 5000.,
dampcoef         = 0.2,
khdif            = 400,
kvdif            = 100,
non_hydrostatic = .true.,
pert_coriolis    = .true.,
mix_full_fields  = .true.,
/

```

```

&bdy_control
periodic_x        = .true.,
symmetric_xs     = .false.,
symmetric_xe     = .false.,
open_xs          = .false.,
open_xe          = .false.,
periodic_y       = .true.,
symmetric_ys     = .false.,
symmetric_ye     = .false.,
open_ys          = .false.,
open_ye          = .false.,
/

```

```

&namelist_quilt
nio_tasks_per_group = 0,
nio_groups = 1,
/

```

### input\_sounding

```

0  15.21353      1.684739      300      0      100000
0  0      0      300      0
14.36386  15.66428      1.734882      300.0574554  0
39.51661  16.46412      1.795376      300.1580664  0
68.32745  16.91014      1.821371      300.2733098  0
104.4252  17.33809      1.834659      300.4177008  0
147.903   17.6819  1.836351      300.591612   0
195.1703  17.95195      1.828004      300.7806812  0
246.326   18.13941      1.816244      300.985304   0
305.0642  18.34531      1.79469  301.2202568   0
371.5457  18.59395      1.757789      301.4861828  0
445.8617  18.94404      1.687326      301.7834468  0
528.2252  19.27828      1.604498      302.1129008  0
622.5799  19.60619      1.510228      302.4903196  0
729.2806  19.82945      1.437  302.9171224   0
840.8768  19.99547      1.367795      303.3635072  0

```



|          |          |              |            |   |
|----------|----------|--------------|------------|---|
| 1086.145 | 20.18544 | 1.245873     | 304.34458  | 0 |
| 1475.502 | 20.11891 | 1.138823     | 305.902008 | 0 |
| 1879.58  | 19.61444 | 1.19511      | 307.51832  | 0 |
| 2299.135 | 19.99515 | 0.9100478    | 309.19654  | 0 |
| 2903.724 | 19.80644 | 0.882338     | 311.614896 | 0 |
| 3675.125 | 20.07976 | 0.4701067    | 314.7005   | 0 |
| 4424.906 | 20.15394 | 0.217673     | 317.699624 | 0 |
| 5150.854 | 20.15331 | 0.1040568    | 320.603416 | 0 |
| 5851.01  | 20.13972 | 0.05413042   | 323.40404  | 0 |
| 6523.846 | 20.12534 | 0.02823016   | 326.095384 | 0 |
| 7167.809 | 20.11333 | 0.0145569    | 328.671236 | 0 |
| 7781.478 | 20.10371 | 0.007098135  | 331.125912 | 0 |
| 8364.123 | 20.09343 | 0.001647223  | 333.456492 | 0 |
| 8916.062 | 20.08292 | -0.002034351 | 335.664248 | 0 |
| 9437.159 | 20.07114 | -0.004490612 | 337.748636 | 0 |
| 9918.392 | 20.06209 | -0.005408974 | 339.673568 | 0 |
| 10351.67 | 20.05387 | -0.005584579 | 341.40668  | 0 |
| 10739.01 | 20.04557 | -0.005253968 | 342.95604  | 0 |
| 11083.74 | 20.03736 | -0.004549216 | 344.33496  | 0 |
| 11389.16 | 20.02689 | -0.003294062 | 345.55664  | 0 |
| 11658.5  | 20.01003 | -0.000894236 | 346.634    | 0 |
| 11895.04 | 19.99507 | 0.001371083  | 347.58016  | 0 |
| 12131.58 | 20       | 0            | 348.52632  | 0 |

### Input\_soil

|          |            |            |
|----------|------------|------------|
| 0.000000 | 300.000000 | 300.000000 |
| 0.050000 | 300.000000 | 1.00000    |
| 0.250000 | 300.000000 | 1.00000    |
| 0.700000 | 300.000000 | 1.00000    |
| 1.500000 | 300.000000 | 1.00000    |

In addition, the user should edit the script `make_scm_forcing.ncl`. On line 37, change the time to the starting time of the simulation, in our case,  
`initTime = "2018-08-15_00:00:00";` need to be in WRF format

then run the script using NCL (NCAR Command Language).
